# Supplementary material for: Following the nanostructural molecular orientation guidelines for sulfur versus thiophene units in small molecule photovoltaic cells
Source: Royal Society of Chemistry journal article supplement (doi:10.1039/c6nr00775a), 2016-01-01
Supplement: c6nr00775a1.pdf [file c6nr00775a1.pdf]

Electronic Supplementary Information (ESI)

**Following the nano-structural molecular orientation guidelines  
for sulfur versus thiophene units in small molecule photovoltaic  
cells**

Yu Jin Kim and Chan Eon Park\*

POSTECH Organic Electronics Laboratory, Department of Chemical Engineering, Pohang  
University of Science and Technology, Pohang, 790-784, Republic of Korea

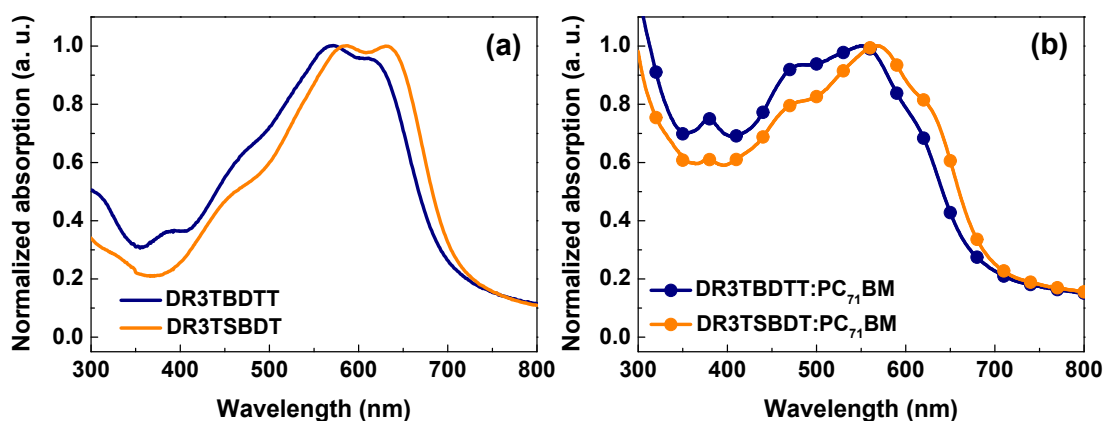

**Fig. S1** Normalized UV-vis absorption spectra of pure small molecule (a) and small molecule:PC<sub>71</sub>BM films (b).

We investigated the UV-vis absorption spectra of active films (pure small molecule (a) and small molecule:PC<sub>71</sub>BM films (b)). In the pure small molecule films, the **DR3TSBDT** absorption spectrum more red-shifted relative to that in **DR3TBDTT** film. Furthermore, the absorption maximum peak ( $\lambda_{\text{max}}$ ) at ca. 630 nm appears with shaper and more intense in pure **DR3TSBDT** film. These results indicate that the presence of more ordered aggregation and stronger  $\pi$ - $\pi$  stacking appears in **DR3TSBDT** films<sup>S1</sup>, which are agree with AFM and 2D-GIWAXS analyses. Moreover, in the small molecule:PC<sub>71</sub>BM films, the absorption spectrum of **DR3TSBDT** blends also slightly red-shifted with higher shoulder peak at ca. 635 nm than that of **DR3TBDTT**:PC<sub>71</sub>BM film. However, in short absorption range (300 – 500 nm), which is due to PCBM domains<sup>S2</sup>, absorption band are revealed with stronger and higher intensity in the **DR3TBDTT**:PC<sub>71</sub>BM films. All Two findings are quite consistent with line-cut profiles of 2D-GIWAXS (Fig. 4g-h).

S1 Z. He, B. Xiao, F. Liu, H. Wu, Y. Yang, S. Xiao, C. Wang, T. P. Russell and Y. Cao, *Nat. Photonics* 2015, **9**, 174-179.

S2 C. Dyer-Smith, I. A. Howard, C. Cabanetos, A. E. Labban, P. M. Beaujuge and F. Laquai, *Adv. Energy Mater.*, 2015, **5**, 1401778.
